# Supplementary material
Source: PubMed Central journal article supplement (PMC3769789)
Supplement: NIHMS439631-supplement-supplement_1.pdf [file NIHMS439631-supplement-supplement_1.pdf]

**Supplement Table 1:** Determinants of willingness to participate in an intervention study to eat brown rice every day for 6 months

|                                                                                              | <b>% participants willing<br/>to participate in an<br/>intervention study</b> | <b>p-value *</b>       |
|----------------------------------------------------------------------------------------------|-------------------------------------------------------------------------------|------------------------|
| Total (n = 80)                                                                               | 61%                                                                           |                        |
| <b>Determinants</b>                                                                          |                                                                               |                        |
| Gender                                                                                       |                                                                               |                        |
| <i>Male (n = 38)</i>                                                                         | 87%                                                                           | 0.004                  |
| <i>Female (n = 42)</i>                                                                       | 38%                                                                           |                        |
| Who buys the rice for the family?                                                            |                                                                               |                        |
| <i>Respondent (n = 42)</i>                                                                   | 43%                                                                           | 0.006                  |
| <i>Others (n = 38)</i>                                                                       | 82%                                                                           |                        |
| <i>Rating for overall sensory attributes for the<br/>with sambar – regarding the overall</i> | <i>0% polishing (Brown)<br/>Quality</i>                                       | <i>raw rice cooked</i> |
| <i>Like (n = 31)</i>                                                                         | 74%                                                                           | 0.001                  |
| <i>Neither like nor dislike (n = 5)</i>                                                      | 100%                                                                          |                        |
| <i>Dislike (n = 44)</i>                                                                      | 48%                                                                           |                        |
| Cooking oil                                                                                  |                                                                               |                        |
| <i>Palm oil (n = 24)</i>                                                                     | 29%                                                                           | 0.005                  |
| <i>Other types of oil: sunflower oil, peanut<br/>oil, or sesame oil (n = 47)</i>             | 77%                                                                           |                        |

\* p- values are from a multivariate logistic regression model.
